# Supplementary material for: Determination of the distribution of rare earth elements La and Gd in Daphnia magna via micro and nano-SXRF imaging
Source: Royal Society of Chemistry journal article supplement (doi:10.1039/d3em00133d), 2023-01-01
Supplement: d3em00133d1.pdf [file d3em00133d1.pdf]

- S1:** Composition of the test media according to DIN EN ISO 6341:2013-01 protocol.
- pH adjusted to  $7.00 \pm 0.2$ . Salinity did not exceed 0.585 ppt.

| Cations                                    | Ligands                                   |
|--------------------------------------------|-------------------------------------------|
| $\text{Ca}^{2+} = 79,38 \text{ mg L}^{-1}$ | $\text{SO}_4^{2-} = 48 \text{ mg L}^{-1}$ |
| $\text{Mg}^{2+} = 12 \text{ mg L}^{-1}$    | $\text{Cl}^{-1} = 313 \text{ mg L}^{-1}$  |
| $\text{Na}^{+} = 17,48 \text{ mg L}^{-1}$  |                                           |
| $\text{K}^{+} = 2,99 \text{ mg L}^{-1}$    |                                           |

3

- S2:** La and Gd forms ( $\text{mg L}^{-1}$ ) after equilibrium according Visual MINTEQ speciation
- modelling.

| Nominal concentrations ( $\text{mg L}^{-1}$ ) |                                        | 5            | 10          | 15          | 20          | 25          | 30          |
|-----------------------------------------------|----------------------------------------|--------------|-------------|-------------|-------------|-------------|-------------|
| <b>La</b>                                     | <b>% dissolved</b>                     | <b>17.10</b> | <b>8.55</b> | <b>5.70</b> | <b>4.27</b> | <b>3.42</b> | <b>2.85</b> |
| La dissolved forms ( $\text{mg L}^{-1}$ )     | $\text{La}(\text{CO}_3)_2^{-}$         | 6.00E-05     | 6.00E-05    | 6.00E-05    | 6.00E-05    | 6.00E-05    | 6.00E-05    |
|                                               | $\text{La}(\text{SO}_4)_2^{-}$         | 0.01         | 0.01        | 0.01        | 0.01        | 0.01        | 0.01        |
|                                               | $\text{La}^{+3}$                       | 0.55         | 0.55        | 0.55        | 0.55        | 0.55        | 0.55        |
|                                               | $\text{LaCl}^{+2}$                     | 0.01         | 0.01        | 0.01        | 0.01        | 0.01        | 0.01        |
|                                               | $\text{LaCO}_3^{+}$                    | 0.05         | 0.05        | 0.05        | 0.05        | 0.05        | 0.05        |
|                                               | $\text{LaHCO}_3^{+2}$                  | 0.01         | 0.01        | 0.01        | 0.01        | 0.01        | 0.01        |
|                                               | $\text{LaOH}^{+2}$                     | 0.01         | 0.01        | 0.01        | 0.01        | 0.01        | 0.01        |
|                                               | $\text{LaSO}_4^{+}$                    | 0.42         | 0.42        | 0.42        | 0.42        | 0.42        | 0.42        |
| La solid form ( $\text{mg L}^{-1}$ )          | $\text{La}_2(\text{CO}_3)_3(\text{s})$ | 6.83         | 15.07       | 23.31       | 31.55       | 39.79       | 48.03       |

6

| Nominal concentrations (mg L <sup>-1</sup> ) |                                                    | 5          | 10         | 15           | 20           | 25           | 30           |
|----------------------------------------------|----------------------------------------------------|------------|------------|--------------|--------------|--------------|--------------|
| <b>Gd</b>                                    | <b>% dissolved</b>                                 | <b>100</b> | <b>100</b> | <b>96.17</b> | <b>72.13</b> | <b>57.70</b> | <b>38.39</b> |
| Gd dissolved forms (mg L <sup>-1</sup> )     | Gd(CO <sub>3</sub> ) <sub>2</sub> <sup>-</sup>     | 4.22E-03   | 0.01       | 0.01         | 0.01         | 0.01         | 0.01         |
|                                              | Gd(SO <sub>4</sub> ) <sub>2</sub> <sup>-</sup>     | 0.02       | 0.05       | 0.07         | 0.07         | 0.07         | 0.07         |
|                                              | Gd <sup>+3</sup>                                   | 2.73       | 5.48       | 7.94         | 7.94         | 7.94         | 7.94         |
|                                              | GdCl <sup>+2</sup>                                 | 0.03       | 0.06       | 0.09         | 0.09         | 0.09         | 0.09         |
|                                              | GdCO <sub>3</sub> <sup>+</sup>                     | 1.00       | 2.00       | 2.89         | 2.89         | 2.89         | 2.89         |
|                                              | GdHCO <sub>3</sub> <sup>+2</sup>                   | 0.03       | 0.06       | 0.08         | 0.08         | 0.08         | 0.08         |
|                                              | GdOH <sup>+2</sup>                                 | 0.25       | 0.51       | 0.73         | 0.73         | 0.73         | 0.73         |
|                                              | GdSO <sub>4</sub> <sup>+</sup>                     | 2.04       | 4.02       | 5.73         | 5.73         | 5.73         | 5.73         |
| Gd solid form (mg L <sup>-1</sup> )          | Gd <sub>2</sub> (CO <sub>3</sub> ) <sub>3(s)</sub> | 0.00       | 0.00       | 0.90         | 8.76         | 16.63        | 24.49        |

7

8 **S3**: Element map detail of internal structure (circle in Figure 2c) in *D. magna* exposed to 15  
9 mg L<sup>-1</sup> of La for 72 h. Beamline: NANOSCOPIUM. Incident energy of 17.02 keV, pixel size  
10 of 0.4 μm and integration time of 100 ms. (a) La (b) S (c) Zn (d) Fe.

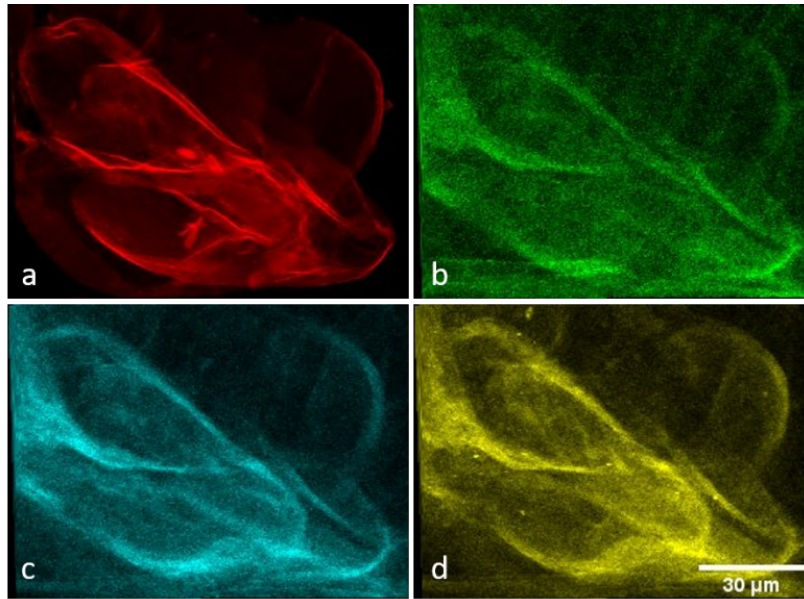

11

12 **S4:** Distribution of Gd in organism of figure 2e (exposed to  $15\text{mg L}^{-1}$  of Gd for 48h). Area  
 13 selected: a. Filtering setae, b. intestine, c. shell gland, d. articulation of the antenna. Scale: 200  
 14  $\mu\text{m}$ . Beamline: NANOSCOPIUM. Incident energy of 17.02 keV, pixel size of 1  $\mu\text{m}$ ,  
 15 integration time of 20 ms.

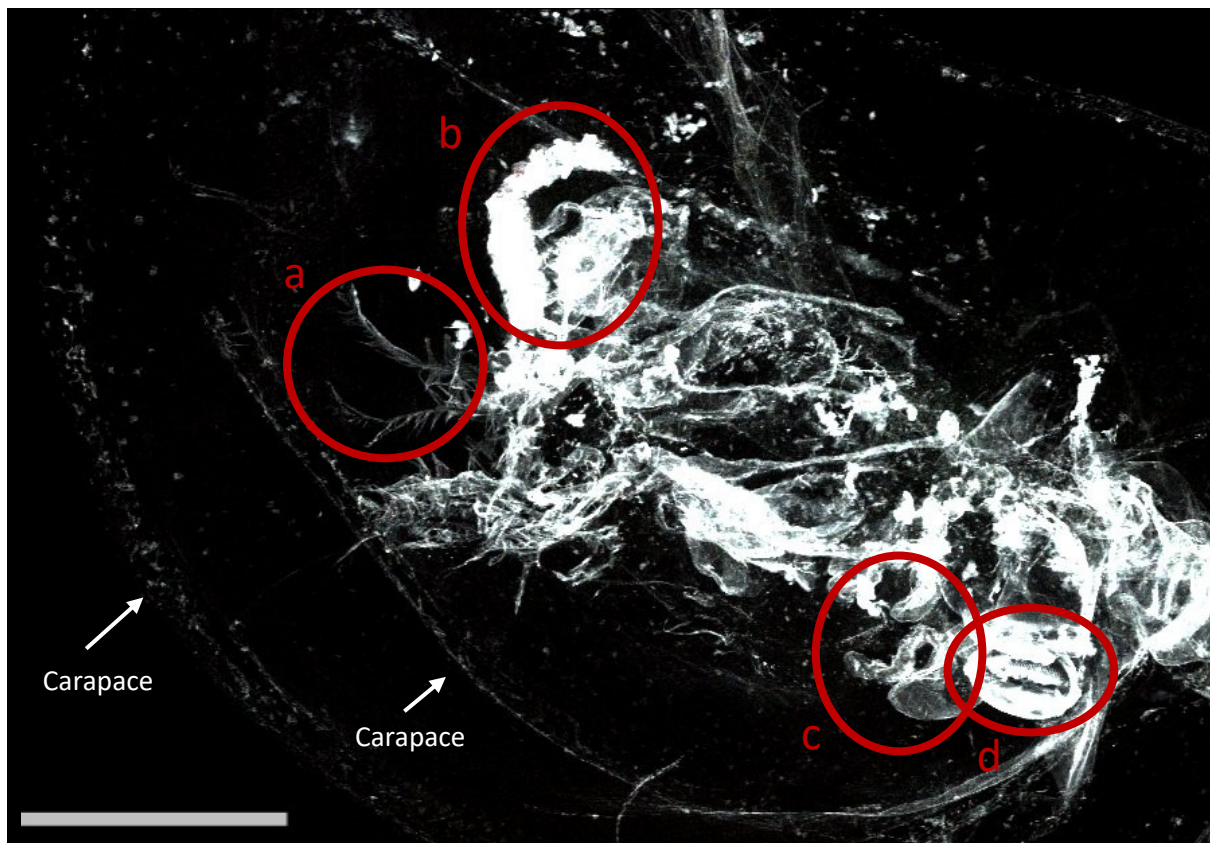

16



18 **S5:** Visualization of the intestinal tract with Compton images. Scale: 200  $\mu\text{m}$ . Beamline:  
19 NANOSCOPIUM. Incident energy of 17.02 keV, pixel size of 1  $\mu\text{m}$ , integration time of 20  
20 ms.

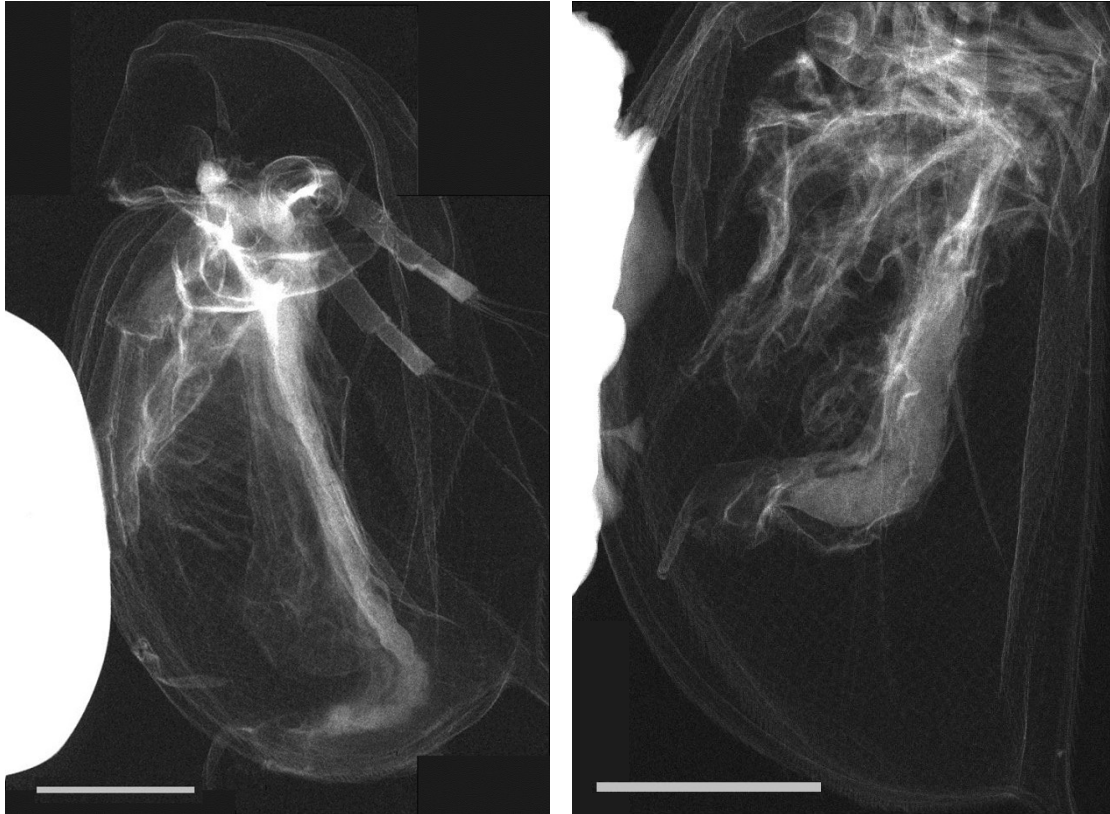

21

22

23 **S6:** Normalized intensity of La and Gd measured in the total organisms and in the intestinal  
 24 tract. Beamline: NANOSCOPIUM. Incident energy of 17.02 keV. N.A. : not available

|                                               | Total intensity | Intensity in the intestinal tract |
|-----------------------------------------------|-----------------|-----------------------------------|
| 15 mg L <sup>-1</sup> La for 48 h (Figure 2a) | 1897            | 1399                              |
| 15 mg L <sup>-1</sup> La for 72 h (Figure 2b) | 1783            | 1396                              |
| 15 mg L <sup>-1</sup> La for 72 h (Figure 2c) | 1671            | 1359                              |
| 15 mg L <sup>-1</sup> Gd for 48 h (Figure 2d) | 290             | N.A.                              |
| 15 mg L <sup>-1</sup> Gd for 48 h (Figure 2e) | 233             | N.A.                              |
| 15 mg L <sup>-1</sup> Gd for 72 h (Figure 2f) | 1379            | N.A.                              |

25

26 **S7:** Distribution of Gd in organism of figure 2d viewed from the front. Grey: calcium and red:  
 27 gadolinium. Scale: 200  $\mu$ m. Beamline: NANOSCOPIUM. Incident energy of 17.02 keV, pixel  
 28 size of 1  $\mu$ m, integration time of 20 ms.

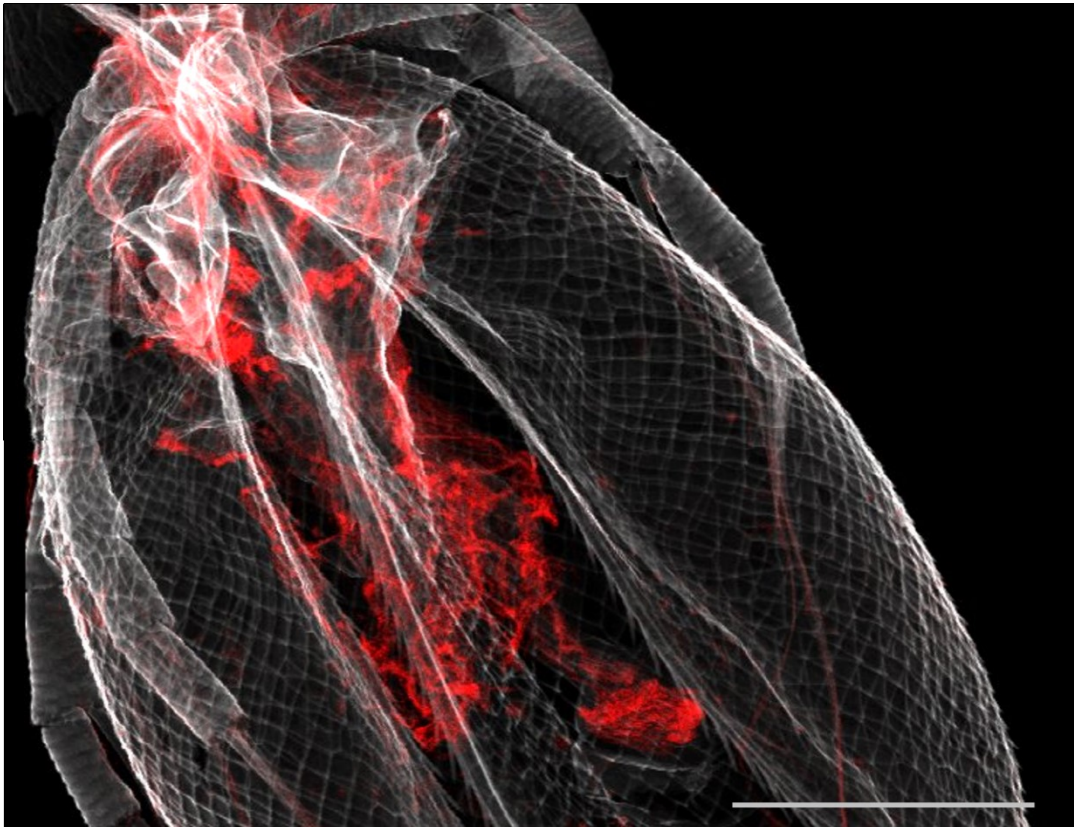

29

30 **S8:** Ratio between Ln and Ca intensity for different organisms at 48 and 72h. Beamline:

31 LUCIA. Incident energy of 7.25 keV.

32

| Organisms    | La/Ca           | Gd/Ca           |
|--------------|-----------------|-----------------|
| Control 48 h | 1.07E-06        | 2.55E-03        |
| Control 48 h | 1.92E-04        | 4.35E-04        |
| Control 48 h | 2.95E-04        | 3.93E-04        |
| Control 48 h | 2.68E-05        | 5.75E-05        |
| Control 72 h | 4.56E-04        | 1.48E-05        |
| Control 72 h | 8.76E-06        | 3.17E-04        |
| Control 72 h | 2.76E-07        | 9.18E-05        |
| Control 72 h | 3.03E-05        | 1.10E-04        |
| Gd 48 h      | 1.07E-06        | <b>4.59E-01</b> |
| Gd 48 h      | 1.92E-04        | <b>9.71E-01</b> |
| Gd 72 h      | 4.56E-04        | <b>1.41E+01</b> |
| La 48 h      | <b>6.17E-02</b> | 2.55E-03        |
| La 48 h      | <b>1.62E-01</b> | 4.35E-04        |
| La 72 h      | <b>2.29E-01</b> | 1.48E-05        |
